# Supplementary material for: Isolated systolic hypertension of the young and its association with central blood pressure in a large multi-ethnic population. The HELIUS study
Source: PubMed Central journal article supplement — Eur J Prev Cardiol. 2018 May 29;25(13):1351–9. doi: 10.1177/2047487318777430 (PMC6130124; doi:10.1177/2047487318777430), 2018-05-29

## Online supplements

### Gender differences in subjects with ISH

|                                       | Men (n=90) | Women (n=19) |
|---------------------------------------|------------|--------------|
| Age                                   | 29.0±6.1   | 32.6±6.8     |
| Height, cm                            | 180.2±7.1  | 162.7±6.5    |
| BMI, kg/m <sup>2</sup>                | 27.1±4.2   | 34.2±8.5     |
| Central systolic BP, mmHg             | 117.4±10.5 | 129.5±18.7   |
| Brachial systolic BP, mmHg            | 131.2±10.4 | 133.0±14.3   |
| Systolic pressure amplification, mmHg | 13.7±5.0   | 3.4±8.8      |
| Diastolic BP, mmHg                    | 76.1±7.6   | 81.2±9.6     |
| Heart rate, beats/min                 | 59.4±7.9   | 64.5±7.5     |
| PWV, m/sec                            | 6.9±1.0    | 7.9±2.0      |
| AIx, %                                | 10.6±8.5   | 27.9±15.1    |
| AIx@hr75, %                           | 6.8±9.5    | 14.8±11.3    |
| Stroke volume, ml                     | 116.6±12.4 | 101.1±16.8   |
| SVR, dynes/sec/cm <sup>5</sup>        | 1141±256   | 1235±349     |
| Smoking, %                            | 31         | 12           |
| Diabetes, %                           | 1.8        | 9.1          |
| Total cholesterol, mmol/l             | 4.7±1.0    | 4.8±0.8      |

Measurement performed in supine position. BP: blood pressure. BMI: body mass index. Systolic pressure amplification = brachial – central systolic BP. PWV: pulse wave velocity. AIx: augmentation index. SVR: systemic vascular resistance.

Flow chart study population.

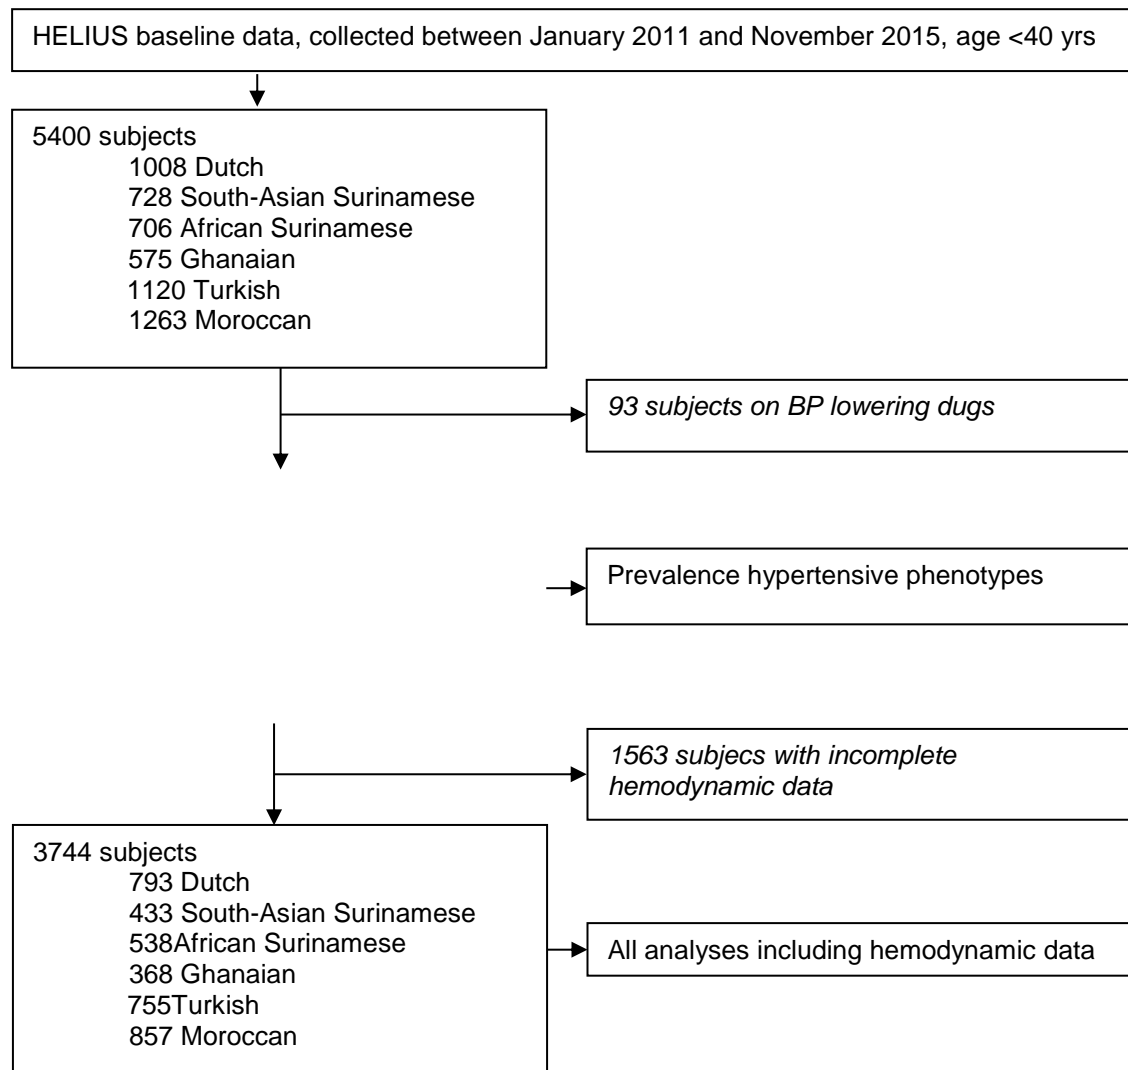

Supplement: Supplemental_material.pdf [file Supplemental_material.pdf]
